# Supplementary material for: On the atmospheric budget of 1,2-dichloroethane and its impact on stratospheric chlorine and ozone (2002–2020)
Source: Copernicus journal article supplement (doi:10.5194/acp-24-13457-2024), 2024-12-06
Supplement: Supplementary file 1 [file acp-24-13457-2024-supplement.pdf]

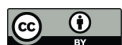

*Supplement of*

## **On the atmospheric budget of 1,2-dichloroethane and its impact on stratospheric chlorine and ozone (2002–2020)**

**Ryan Hossaini et al.**

*Correspondence to:* Ryan Hossaini (r.hossaini@lancaster.ac.uk)

The copyright of individual parts of the supplement might differ from the article licence.

**Table S1.** Summary statistics (mean and median) of observed and modelled DCE at Bachok and Taiwan. Model data is shown for the scenario sc05 ( $\alpha_1 = 0.5/1.5\%$ ).

| Site   | Year | Sampling months | # obs. | Measured DCE (ppt)  |        | Modelled DCE (ppt)   |        |
|--------|------|-----------------|--------|---------------------|--------|----------------------|--------|
|        |      |                 |        | Mean ( $\pm 1$ s.d) | Median | Mean ( $\pm 1$ s.d)  | Median |
| Bachok | 2014 | Jan/Feb         | 16     | 46.2 ( $\pm 28$ )   | 50.7   | 34.1 ( $\pm 13.0$ )  | 32.4   |
| Bachok | 2015 | Nov/Dec         | 24     | 24.9 ( $\pm 20$ )   | 16.1   | 14.3 ( $\pm 7.0$ )   | 11.6   |
| Bachok | 2016 | Jan             | 17     | 20.9 ( $\pm 15$ )   | 14.0   | 12.2 ( $\pm 5.3$ )   | 10.2   |
| Bachok | 2017 | Jan/Feb/Mar/Apr | 41     | 18.8 ( $\pm 10$ )   | 16.8   | 24.8 ( $\pm 12.9$ )  | 22.1   |
| Bachok | 2018 | Dec             | 2      | 25.6 ( $\pm 14$ )   | 35.5   | 6.4 ( $\pm 7.2$ )    | 11.5   |
| Bachok | 2019 | Jan/Feb         | 26     | 44.4 ( $\pm 48$ )   | 28.7   | 25.0 ( $\pm 16.0$ )  | 19.8   |
| Bachok | 2020 | Dec/Jan/Feb     | 17     | 44.2 ( $\pm 41$ )   | 33.5   | 29.7 ( $\pm 17.0$ )  | 26.3   |
|        |      |                 |        |                     |        |                      |        |
| Taiwan | 2014 | Mar/Apr         | 24     | 137.5 ( $\pm 190$ ) | 82.8   | 120.5 ( $\pm 12.7$ ) | 121.0  |
| Taiwan | 2015 | Mar/Apr         | 23     | 84.3 ( $\pm 83$ )   | 59.0   | 131.4 ( $\pm 20.8$ ) | 128.5  |
| Taiwan | 2016 | Mar/Apr         | 0      | -                   | -      | 125.1 ( $\pm 19.5$ ) | 121.4  |
| Taiwan | 2017 | Apr/May         | 31     | 83.5 ( $\pm 69$ )   | 58.4   | 131.2 ( $\pm 21.6$ ) | 128.5  |
| Taiwan | 2018 | Apr/May/Jun     | 28     | 146.7 ( $\pm 137$ ) | 103.2  | 154.9 ( $\pm 21.5$ ) | 149.4  |
| Taiwan | 2019 | Mar/May         | 52     | 143.5 ( $\pm 127$ ) | 116.9  | 140.2 ( $\pm 19.5$ ) | 139.2  |
| Taiwan | 2020 | Apr/May         | 40     | 102.0 ( $\pm 85$ )  | 63.1   | 136.3 ( $\pm 15.8$ ) | 141.8  |

45 **Table S2.** Observed and modelled DCE abundance (ppt) averaged in 1 km altitude bins during KORUS-AQ.  $n$  denotes the number of measurements in each bin. Median DCE is reported with values in square brackets denoting the 25<sup>th</sup> and 75<sup>th</sup> percentile. The mean bias (MB, model minus observation) is given for each bin. Model results are based on scenario sc05 ( $\alpha_1 = 0.5/1.5\%$ ).

| Altitude bin<br>centre (km) | KORUS-AQ campaign |                           |                           |                 |
|-----------------------------|-------------------|---------------------------|---------------------------|-----------------|
|                             | $n$               | <i>Observed DCE (ppt)</i> | <i>Modelled DCE (ppt)</i> | <i>MB (ppt)</i> |
| <b>0.5</b>                  | 1323              | 68.9 [33.9, 126.6]        | 52.7 [38.7, 71.2]         | -16.2           |
| <b>1.5</b>                  | 573               | 37.2 [22.5, 73.9]         | 45.4 [33.8, 57.7]         | 8.2             |
| <b>2.5</b>                  | 256               | 22.0 [17.5, 36.4]         | 27.7 [20.8, 44.1]         | 5.7             |
| <b>3.5</b>                  | 155               | 18.1 [15.7, 23.7]         | 16.6 [15.4, 18.8]         | -1.5            |
| <b>4.5</b>                  | 119               | 16.0 [14.2, 18.8]         | 15.9 [14.8, 17.0]         | -0.1            |
| <b>5.5</b>                  | 94                | 15.1 [14.0, 18.3]         | 15.5 [14.6, 16.4]         | 0.4             |
| <b>6.5</b>                  | 104               | 15.1 [13.5, 16.7]         | 15.4 [13.9, 17.3]         | 0.3             |
| <b>7.5</b>                  | 160               | 14.7 [12.9, 18.2]         | 14.6 [13.4, 15.7]         | -0.1            |

50

55

60

65

**Table S3.** Comparison of DCE emission estimates (Gg/yr) for parts of East Asia from this work (scenario sc05) and previous studies.

| <b>Study</b>                    | <b>Region</b> | <b>Emission estimate (Gg/yr)</b> | <b>For year</b> | <b>Method</b>                        |
|---------------------------------|---------------|----------------------------------|-----------------|--------------------------------------|
| Wang et al. (2014)              | China         | 121.6 ( $\pm 89$ )               | 2010            | Tracer ratio                         |
| Oram et al. (2017)              | China         | 203 ( $\pm 9$ )                  | 2015            | Tracer ratio                         |
| This work, $\alpha_1=0.5/1.5\%$ | China+Taiwan  | 89 (73-106)                      | 2010            | Bottom-up<br>(see main text Sect. 2) |
| This work. $\alpha_1=0.5/1.5\%$ | China+Taiwan  | 107 (87-127)                     | 2015            | Bottom-up<br>(see main text Sect. 2) |

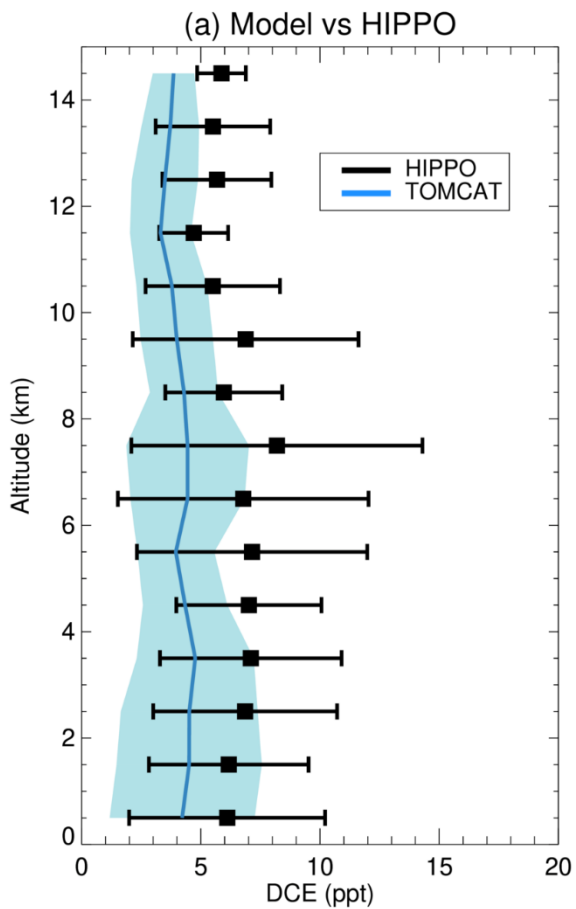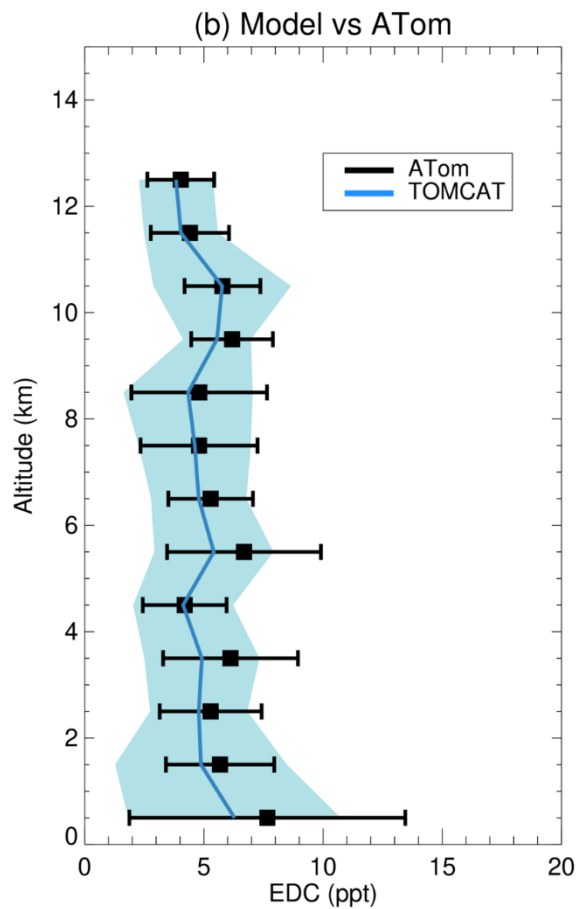

75

**Figure S1.** Tropical ( $\pm 20^\circ$  N/S) mean DCE profiles (ppt) observed during (a) HIPPO and (b) ATom averaged in 1 km altitude bins ( $\pm 1$  s.d). The corresponding model profiles are shown for emission scenario sc05.

80

85

90

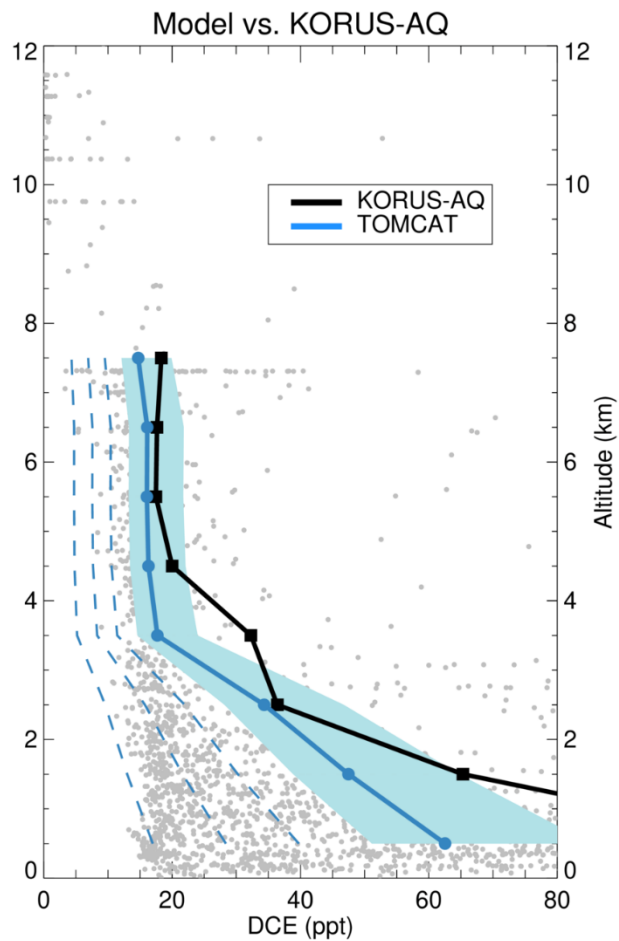

95

**Figure S2.** As Figure 3 (panel c) of the main manuscript but comparing the mean KORUS-AQ measurement data with the mean model data (as opposed to the median) in different altitude bins.

100

105

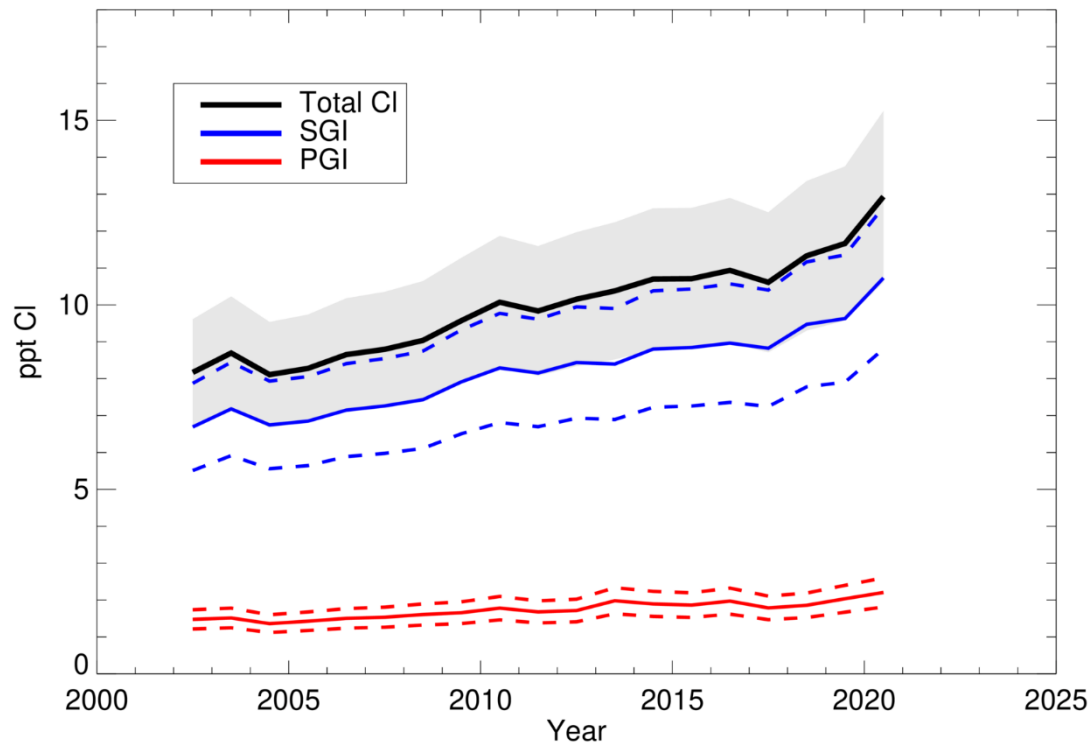

**Figure S3.** Modelled annual mean stratospheric chlorine SGI, PGI and total (SGI + PGI) due to DCE (ppt Cl) diagnosed at the tropical tropopause. Solid lines represent results from emission scenario sc05  
 110 with shading or dotted lines denoting the range from scenarios sc04 and sc06.

115

120

125

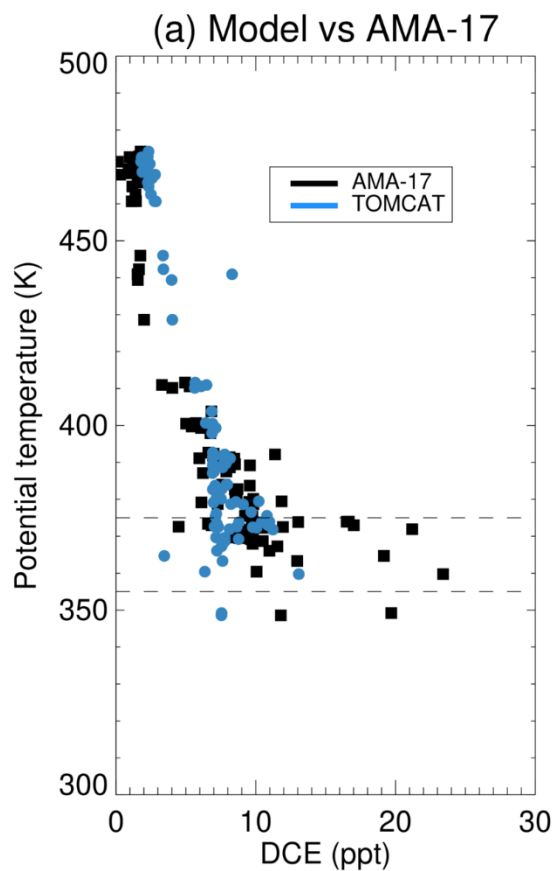

**Figure S4.** DCE mole fraction (ppt) vs potential temperature observed during the AMA-17 campaign (Adcock et al., 2021) and corresponding model estimates for emission scenario sc05. The horizontal dashed lines denote the tropopause region (355-375 K).



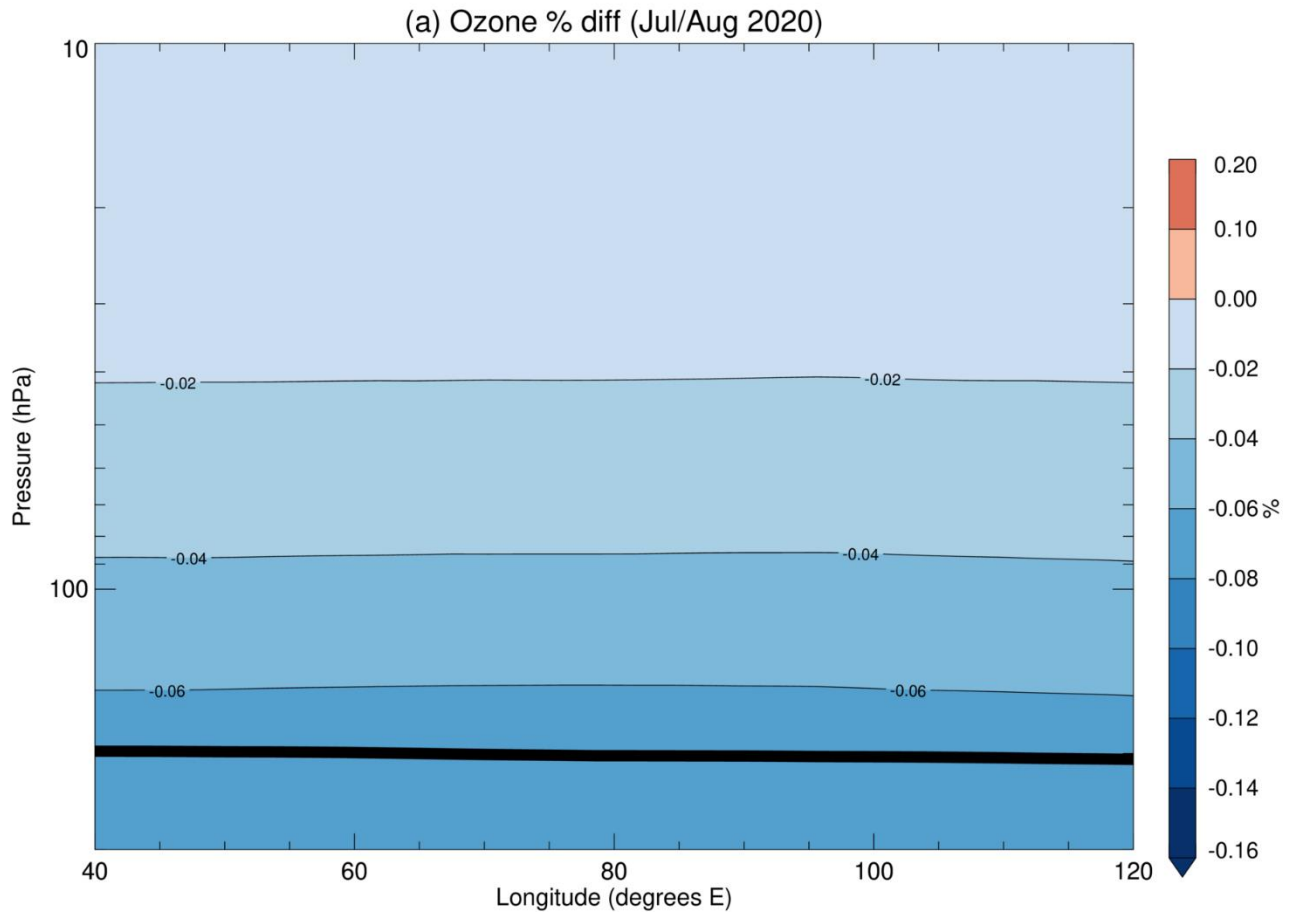

**Figure S5.** Longitude–pressure cross section of the modelled stratospheric ozone decrease (%) due to DCE in 2020. The change is averaged over July/August and over the approximate latitude range of the Asian Summer Monsoon anticyclone (20–40° N latitude). The ozone change is calculated as the  
145 difference between a simulation with DCE (scenario sc05) and without DCE.
